# Supplementary material
Source: PubMed Central journal article supplement (PMC2633853)
Supplement: pp.108.130716_1.pdf [file pp.108.130716_1.pdf]

## Supplemental figure S1.

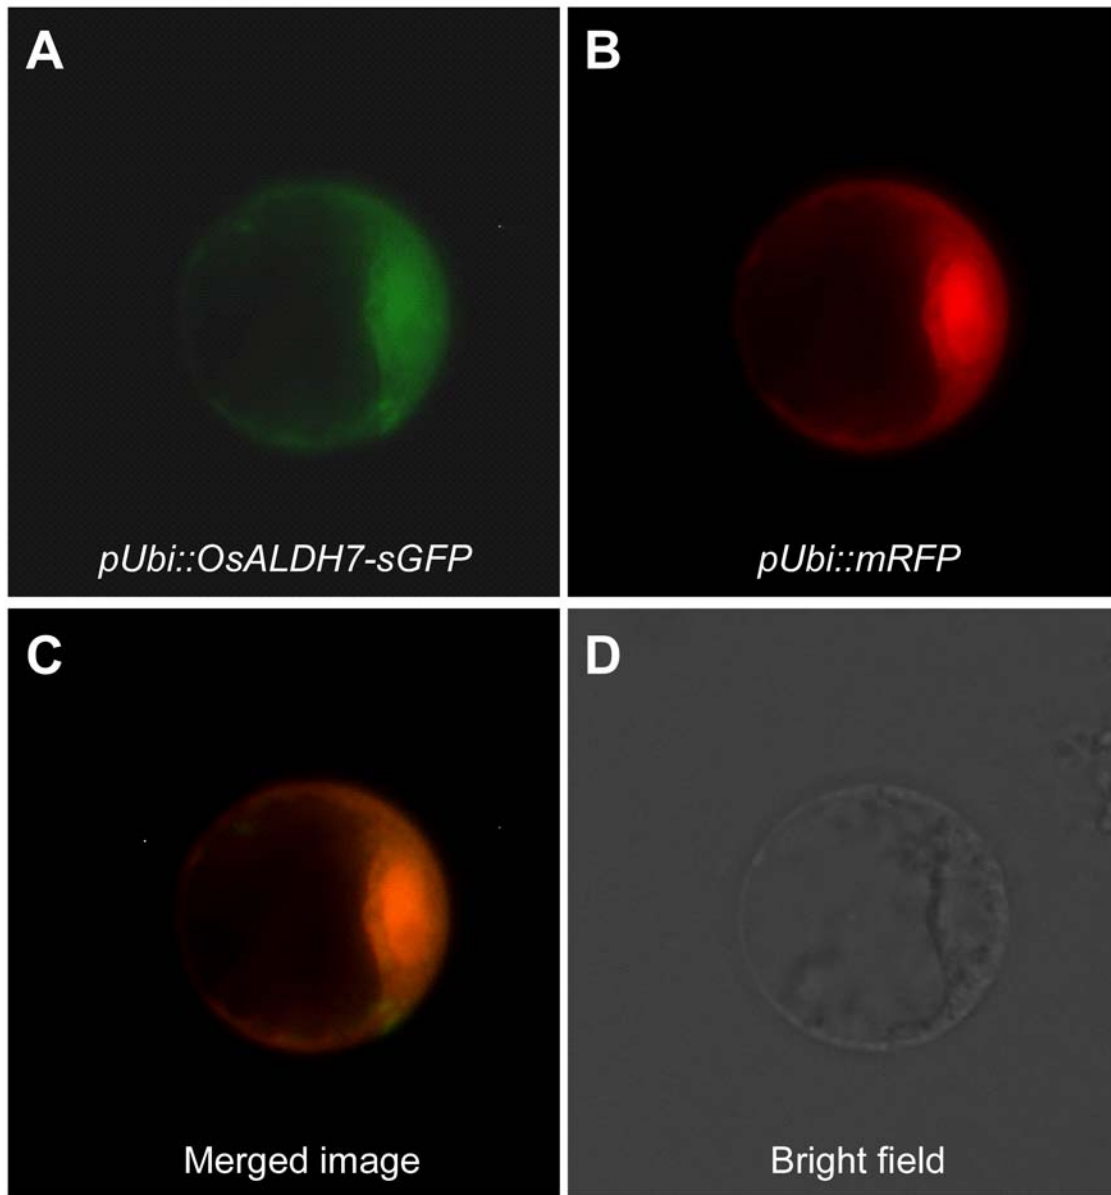

Figure S1. Subcellular localization of OsALDH7::sGFP fusion protein. Protoplasts were derived from rice Oc cells. (A) *pUbiquitin::OsALDH7-sGFP*, (B) *pUbiquitin::mRFP*, (C) Merged image, (D) Image in bright field.
